# Supplementary material for: Lockdowns, lethality, and laissez-faire politics. Public discourses on political authorities in high-trust countries during the COVID-19 pandemic
Source: PubMed Central journal article supplement (PMC8221506; doi:10.1371/journal.pone.0253175), 2021-06-23
Supplement: pone.0253175.s001.pdf [file pone.0253175.s001.pdf]

## S1 Appendix: Timelines (by country)

| <b>TABLE A: COVID-19 TIMELINE, DENMARK</b> |                                                                                                                                                                                                                                                                                                                                                                                               |
|--------------------------------------------|-----------------------------------------------------------------------------------------------------------------------------------------------------------------------------------------------------------------------------------------------------------------------------------------------------------------------------------------------------------------------------------------------|
| February 27 <sup>th</sup>                  | <ul style="list-style-type: none"> <li>First Danish case of COVID-19</li> </ul>                                                                                                                                                                                                                                                                                                               |
| February 28 <sup>th</sup>                  | <ul style="list-style-type: none"> <li>Danish Health Authority holds first press briefing on the status of COVID-19 in Denmark.</li> </ul>                                                                                                                                                                                                                                                    |
| March 6 <sup>th</sup>                      | <ul style="list-style-type: none"> <li>Prime Minister Mette Frederiksen holds 1<sup>st</sup> press conference, recommends that all events with more than 1000 participants be canceled. It is recommended to limit physical contact. The Foreign Ministry changes all green zones to yellow zones.</li> </ul>                                                                                 |
| March 10 <sup>th</sup>                     | <ul style="list-style-type: none"> <li>Prime Minister holds 2<sup>nd</sup> press conference. The Foreign Ministry cautions against traveling to several regions in Italy, Iran, China, South Korea, and Austria. Flights to these areas stopped.</li> <li>A new bailout makes it possible for companies to seek compensation for canceled events with more than 1000 participants.</li> </ul> |
| March 11 <sup>th</sup>                     | <ul style="list-style-type: none"> <li>Prime Minister holds 3<sup>rd</sup> press conference: Denmark will go on lockdown for the next two weeks. All non-essential public personnel is sent home. Schools, childcare facilities, and institutions close. A ban on gatherings of more than 100 people is implemented.</li> </ul>                                                               |
| March 12 <sup>th</sup>                     | <ul style="list-style-type: none"> <li>Business bailout passed.</li> </ul>                                                                                                                                                                                                                                                                                                                    |
| March 13 <sup>th</sup>                     | <ul style="list-style-type: none"> <li>Prime Minister holds 4<sup>th</sup> press conference. Borders will be closed the next day. The foreign ministry advises against all unnecessary travel, and all Danes travelling abroad are advised to return home.</li> </ul>                                                                                                                         |
| March 14 <sup>th</sup>                     | <ul style="list-style-type: none"> <li>Denmark closes borders as one of the first countries in the world.</li> <li>The first COVID-infected Dane dies. Non-acute medical treatments are postponed to free up capacity in the health care sector.</li> <li>The government grants 10 million kroner to COVID-19 research.</li> </ul>                                                            |
| March 15 <sup>th</sup>                     | <ul style="list-style-type: none"> <li>Prime Minister holds 5<sup>th</sup> press conference. A tripartite agreement has been established, ensuring financial support for larger companies that have had to send home employees.</li> </ul>                                                                                                                                                    |
| March 17 <sup>th</sup>                     | <ul style="list-style-type: none"> <li>Prime Minister holds 6<sup>th</sup> press conference. Gathering ban tightened to 10 people from the next day.</li> <li>The Queen addresses the nation</li> </ul>                                                                                                                                                                                       |
| March 20 <sup>th</sup>                     | <ul style="list-style-type: none"> <li>19 Danes have died from COVID-19</li> </ul>                                                                                                                                                                                                                                                                                                            |
| March 21 <sup>st</sup>                     | <ul style="list-style-type: none"> <li>government grants 100 million kroner in financial aid to help developing countries fight Covid-19</li> </ul>                                                                                                                                                                                                                                           |
| March 23 <sup>rd</sup>                     | <ul style="list-style-type: none"> <li>Prime Minister holds 7<sup>th</sup> press conference. All containment measures extended until April 13th.</li> </ul>                                                                                                                                                                                                                                   |
| March 30 <sup>th</sup>                     | <ul style="list-style-type: none"> <li>Prime Minister holds 8<sup>th</sup> press conference. If the positive development continues, Denmark may slowly reopen after Easter.</li> </ul>                                                                                                                                                                                                        |
| March 31 <sup>st</sup>                     | <ul style="list-style-type: none"> <li>109 Danes have died from COVID-19</li> </ul>                                                                                                                                                                                                                                                                                                           |
| April 6 <sup>th</sup>                      | <ul style="list-style-type: none"> <li>Ban on large gatherings extended until August</li> <li>Prime Minister holds 9<sup>th</sup> press conference, presents reopening plan. Childcare institutions and Primary School reopen from mid-April.</li> </ul>                                                                                                                                      |
| April 10 <sup>th</sup>                     | <ul style="list-style-type: none"> <li>260 Danes have died from COVID-19</li> </ul>                                                                                                                                                                                                                                                                                                           |
| April 14 <sup>th</sup>                     | <ul style="list-style-type: none"> <li>Prime Minister holds 10<sup>th</sup> press conference. Development so positive Denmark may be reopened to a further degree than originally planned.</li> </ul>                                                                                                                                                                                         |
| April 16 <sup>th</sup>                     | <ul style="list-style-type: none"> <li>336 Danes have died from COVID-19</li> </ul>                                                                                                                                                                                                                                                                                                           |
| April 17 <sup>th</sup>                     | <ul style="list-style-type: none"> <li>Some private-sector industries to open from April 20<sup>th</sup>.</li> </ul>                                                                                                                                                                                                                                                                          |
| April 18 <sup>th</sup>                     | <ul style="list-style-type: none"> <li>Government adjusts and expands business bailout.</li> <li>Some non-acute medical treatments may be performed again.</li> </ul>                                                                                                                                                                                                                         |
| April 21 <sup>st</sup>                     | <ul style="list-style-type: none"> <li>Increased testing</li> <li>Government passes ban on the gatherings of more than 500 people until September 1st.</li> </ul>                                                                                                                                                                                                                             |
| April 23 <sup>rd</sup>                     | <ul style="list-style-type: none"> <li>394 Danes have died from COVID-19</li> </ul>                                                                                                                                                                                                                                                                                                           |

---

**TABLE B: COVID-19 TIMELINE, GERMANY**

---

|                           |                                                                                                                                                                                                                                          |
|---------------------------|------------------------------------------------------------------------------------------------------------------------------------------------------------------------------------------------------------------------------------------|
| January 27 <sup>th</sup>  | ▪ First German case of COVID-19. German Health Authority does not expect further spread.                                                                                                                                                 |
| February 12 <sup>th</sup> | ▪ Minister of Health Jens Spahn presents containment strategy in Parliament                                                                                                                                                              |
| February 25 <sup>th</sup> | ▪ Germany and neighboring countries agree that border control and cancellation of large events will be ineffective                                                                                                                       |
| February 26 <sup>th</sup> | ▪ New cases in Nordrhein-Westfalen                                                                                                                                                                                                       |
| February 28 <sup>th</sup> | ▪ Germany increases test capacity                                                                                                                                                                                                        |
| March 2 <sup>nd</sup>     | ▪ Minister of Health holds press conference, presents recommendations on protective behavior<br>▪ Germany donates financial aid to help Iran combat COVID-19<br>▪ German Health Authority increases risk level of COVID-19 to "moderate" |
| March 3 <sup>rd</sup>     | ▪ Germany introduces export ban on healthcare equipment                                                                                                                                                                                  |
| March 9 <sup>th</sup>     | ▪ First German dies from COVID-19                                                                                                                                                                                                        |
| March 10 <sup>th</sup>    | ▪ Minister of Health recommends that all events with more than 1000 participants be canceled                                                                                                                                             |
| March 11 <sup>th</sup>    | ▪ Chancellor Angela Merkel addresses the nation for the first time                                                                                                                                                                       |
| March 12 <sup>th</sup>    | ▪ Chancellor encourages the public to practice social distancing                                                                                                                                                                         |
| March 13 <sup>th</sup>    | ▪ All schools and kindergartens close                                                                                                                                                                                                    |
| March 15 <sup>th</sup>    | ▪ Germany goes into lockdown, closing borders as well as places of social gathering, e.g. gyms, restaurants, and churches                                                                                                                |
| March 17 <sup>th</sup>    | ▪ Minister of health encourages public to show solidarity and practice social distancing<br>▪ German health authority increases risk level of COVID-19 to "high". 24 Germans have died from COVID-19                                     |
| March 20 <sup>th</sup>    | ▪ 52 Germans have died from COVID-19                                                                                                                                                                                                     |
| March 22 <sup>nd</sup>    | ▪ contact ban introduced, prohibits gatherings of more than two people                                                                                                                                                                   |
| March 26 <sup>th</sup>    | ▪ Germany to take 47 COVID-19 patients from Italy                                                                                                                                                                                        |
| April 1 <sup>st</sup>     | ▪ 821 Germans have died from COVID-19                                                                                                                                                                                                    |
| April 9 <sup>th</sup>     | ▪ Minister of Health encourages public to practice social distancing over Easter                                                                                                                                                         |
| April 10 <sup>th</sup>    | ▪ 2706 Germans have died from COVID-19                                                                                                                                                                                                   |
| April 15 <sup>th</sup>    | ▪ contact ban extended until May 3rd                                                                                                                                                                                                     |
| April 20 <sup>th</sup>    | ▪ 4642 Germans have died from COVID-19                                                                                                                                                                                                   |

---

---

**Table C: COVID-19 timeline, The Netherlands**

---

|                           |                                                                                                                                                   |
|---------------------------|---------------------------------------------------------------------------------------------------------------------------------------------------|
| February 27 <sup>th</sup> | ▪ First Dutch case of COVID-19                                                                                                                    |
| March 5 <sup>th</sup>     | ▪ 82 confirmed cases in the Netherlands                                                                                                           |
| March 6 <sup>th</sup>     | ▪ First Dutchman has died from COVID-19                                                                                                           |
|                           | ▪ Special containment measures for Noord-Brabant introduced                                                                                       |
| March 9 <sup>th</sup>     | ▪ Minister-President Mark Rutte encourages population to avoid shaking hands                                                                      |
| March 12 <sup>th</sup>    | ▪ Events with more than 100 participants are canceled, people encouraged to work from home if possible.                                           |
| March 15 <sup>th</sup>    | ▪ Schools and childcare institutions close, places of social gathering, e.g. restaurants and sports clubs close.                                  |
| March 17 <sup>th</sup>    | ▪ Business bailout passed.                                                                                                                        |
| March 19 <sup>th</sup>    | ▪ Minister of health Bruno Bruins quits due to burnout                                                                                            |
| March 20 <sup>th</sup>    | ▪ Test kit shortage: testing requirements tightened                                                                                               |
|                           | ▪ 106 Dutchmen have died from COVID-19                                                                                                            |
| March 23 <sup>rd</sup>    | ▪ new containment measures: Cancellation of events extended to June 1, municipalities given authority to close stores and close off crowded areas |
| March 26 <sup>th</sup>    | ▪ Government bans groups in public                                                                                                                |
| March 31 <sup>st</sup>    | ▪ Containment measures extended until April 28th                                                                                                  |
| April 1 <sup>st</sup>     | ▪ 1173 Dutchmen have died from COVID-19                                                                                                           |
| April 5 <sup>th</sup>     | ▪ Number of intensive care beds doubled                                                                                                           |
| April 6 <sup>th</sup>     | ▪ Test capacity increased                                                                                                                         |
| April 8 <sup>th</sup>     | ▪ Pressure on intensive care units eases up                                                                                                       |
| April 10 <sup>th</sup>    | ▪ 2511 Dutchmen died from COVID-19                                                                                                                |
| April 15 <sup>th</sup>    | ▪ Minister-President discusses prerequisites for reopening.                                                                                       |
| April 20 <sup>th</sup>    | ▪ 3751 Dutchmen have died from COVID-19                                                                                                           |
| April 21 <sup>st</sup>    | ▪ The government announces that primary schools are to reopen on May 11th, the ban on public events is extended to September 1st                  |

---

---

**TABLE D: COVID-19 TIMELINE, SWEDEN**

---

|                           |                                                                                                                                         |
|---------------------------|-----------------------------------------------------------------------------------------------------------------------------------------|
| January 31 <sup>st</sup>  | ▪ First Swedish case of COVID-19 (no further contagion)                                                                                 |
| February 27 <sup>th</sup> | ▪ COVID-19 reintroduced to Sweden.                                                                                                      |
| March 2 <sup>nd</sup>     | ▪ COVID-19 risk of new cases in Sweden adjusted to "very high", risk for community spread adjusted to "moderate".                       |
| March 6 <sup>th</sup>     | ▪ Swedish Health Authority (Folkhälsomyndigheten) recommends testing people returning from affected areas in Northern Italy.            |
| March 11 <sup>th</sup>    | ▪ Government holds extraordinary press conference, bans gatherings of more than 500 participants                                        |
| March 16 <sup>th</sup>    | ▪ Government passes emergency bailout                                                                                                   |
| March 18 <sup>th</sup>    | ▪ Government encourages universities and high schools to switch to online learning                                                      |
| March 19 <sup>th</sup>    | ▪ Swedish Health Authority encourages public to consider avoiding traveling if unnecessary, implements a travel ban for non-EU citizens |
| March 20 <sup>th</sup>    | ▪ 30 Swedes that died from COVID-19                                                                                                     |
| March 24 <sup>th</sup>    | ▪ Restaurants, cafes and bars subject to increased regulation                                                                           |
| March 29 <sup>th</sup>    | ▪ Ban on gatherings of more than 50 people                                                                                              |
| April 1 <sup>st</sup>     | ▪ National visitation ban on retirement homes implemented                                                                               |
|                           | ▪ 385 Swedes have died from COVID-19                                                                                                    |
| April 9 <sup>th</sup>     | ▪ Government addresses criticism of being intransparent                                                                                 |
| April 10 <sup>th</sup>    | ▪ 1155 Swedes have died from COVID-19                                                                                                   |
| April 20 <sup>th</sup>    | ▪ 2097 Swedes have died from COVID-19                                                                                                   |

---

## References (S1 Appendix)

1. Bundesministerium für Gesundheit. Coronavirus SARS-CoV-2: Chronik der bisherigen Maßnahmen. Bundesministerium für Gesundheit, 2020 Aug 06 [cited 2020 Aug 14]. German. Available from:  
<https://www.bundesgesundheitsministerium.de/coronavirus/chronik-coronavirus.html>
2. Dansk Erhverv. 2020 Mar 18 [cited 2020 Aug 14]. Forbud mod arrangementer -hvad gælder? Danish. Available from:  
<https://www.danskerhverv.dk/corona/forsamlingsforbud/>
3. Darroch, G. Coronavirus: A timeline of the pandemic in the Netherlands. Dutch News. 2020 May 16 [cited 2020 Aug 14]. Available from  
<https://www.dutchnews.nl/news/2020/05/coronavirus-a-timeline-of-the-pandemic-in-the-netherlands/>
4. Folkhälsomyndigheten. Nya regler för restauranger och krogar. Folkhälsomyndigheten. 2020 March 24 [cited 2020 Aug 14]. Swedish. Available from  
<https://www.folkhalsomyndigheten.se/nyheter-och-press/nyhetsarkiv/2020/mars/nya-regler-for-restauranger-och-krogar/>
5. Justitiedepartementet. Frågor och svar – tillfälligt inreseförbud till EU via Sverige. Regeringskansliet. 2020 May 15 [cited 2020 Aug 14]. Swedish. Available from:  
<https://www.regeringen.se/artiklar/2020/04/fragor-och-svar-inreseedopp-till-eu-via-sverige/>
6. Krisinformation.se. Restriktioner och förbud. Krisinformation.se. 2020 May 12 [cited 2020 Aug 14]. Swedish. Available from: <https://www.krisinformation.se/detta-kan-handa/handelser-och-storningar/20192/myndigheterna-om-det-nya-coronaviruset/restriktioner-och-forbud>

7. nu.nl. Tjidljijn: Het coronavirus in Nederland. nu.nl. 2020 Apr 07 [cited 2020 Aug 14]. Dutch. Available from: <https://www.nu.nl/coronavirus/6040831/tjidljijn-het-coronavirus-in-nederland.html>
8. Ohlin, E. Sveriges andra coronafall bekräftat. Läkartidningen. 2020 Feb 27 [cited 2020 Aug 14]. Swedish. Available from: <https://lakartidningen.se/aktuellt/nyheter/2020/02/sveriges-andra-coronafall-bekraftat/>
9. Radtke, R. Erkrankungs- und Todesfälle mit Coronavirus (COVID-19) in Deutschland 2020. 2020 Aug 14 [cited 2020 Aug 14]. In: Statista [internet]; [1 screen]. German. Available from: <https://de.statista.com/statistik/daten/studie/1102667/umfrage/erkrankungs-und-todesfaelle-aufgrund-des-coronavirus-in-deutschland/>
10. Resumé. Tidslinje: Så har coronakrisen slagit mot branschen – dag för dag. Resumé. 2020 Apr 28 [cited 2020 Aug 14]. Swedish. Available from: <https://www.resume.se/insikt/guide/tidslinje-sa-har-coronakrisen-slagit-mot-branschen-dag-for-dag/>
11. Rønnstad, E. B. TIDSLINJE OVER CORONAKRISEN: HVAD SKETE DER OG HVORNÅR? Tænketanken Europa. 2020 May 04 [cited 2020 Aug 14]. Danish. Available from: <http://thinkeuropa.dk/politik/tidslinje-over-coronakrisen-hvad-skete-der-og-hvornaar>
12. Statsministeriet. Pressemøde 17. marts 2020 om yderligere tiltag mod coronavirus [video; press release]. In: stm.dk [internet]. 2020 Mar 17 [cited 2020 Aug 14]. Danish. Available from: <http://video.stm.dk/pressemode-17-marts-2020-om>
13. SVT Nyheter. Första coronafallet i Sverige. SVT Nyheter. 2020 Jan 31 [cited 2020 Aug 14]. Swedish. Available from: <https://www.svt.se/nyheter/snabbkollen/forsta-virusfallet-i-sverige>
14. SVT Nyheter. Gymnasieskolor och högskolor rekommenderas distansundervisning. SVT Nyheter. 2020 Mar 17 [cited 2020 Aug 14]. Swedish. Available from:

- <https://www.svt.se/nyheter/inrikes/gymnasieskolor-och-hogskolor-rekommenderas-distansundervisning>
15. SVT Nyheter. Lista: Här är restriktionerna som gäller i Sverige. SVT Nyheter. 2020 Mar 25 [cited 2020 Aug 14]. Swedish. Available from: <https://www.svt.se/nyheter/inrikes/lista-har-ar-restriktionerna-som-galler-i-sverige>
  16. SVT Nyheter. Så har regeringen agerat mot corona-pandemin. SVT Nyheter. 2020 Apr 03 [cited 2020 Aug 14]. Swedish. Available from: <https://www.svt.se/nyheter/inrikes/sa-har-regeringen-agerat-mot-corona>
  17. Tagesschau. Einigung auf umfassendes Kontaktverbot. Tagesschau. 2020 Mar 22 [cited 2020 Aug 14]. German. Available from: <https://www.tagesschau.de/inland/kontaktverbot-coronavirus-101.html>
  18. Welt. Maßnahmen, die es so in unserem Land noch nicht gegeben hat. Welt. 2020 Mar 16 [cited 2020 Aug 14]. German. Available from: <https://www.welt.de/politik/deutschland/article206590517/Coronavirus-Was-in-Deutschland-jetzt-schliessen-soll-und-was-nicht.html>
  19. World-o-meters. (2020). Coronavirus: Sweden. 2020 Aug 13 [cited 2020 Aug 13]. In: World-o-meters [internet]; [4 screens]. Available from: <https://www.worldometers.info/coronavirus/country/sweden/>
