# Supplementary material for: Lockdowns, lethality, and laissez-faire politics. Public discourses on political authorities in high-trust countries during the COVID-19 pandemic
Source: PubMed Central journal article supplement (PMC8221506; doi:10.1371/journal.pone.0253175), 2021-06-23
Supplement: pone.0253175.s002.pdf [file pone.0253175.s002.pdf]

## S2 Appendix: Twitter search terms

| TABLE A: TWITTER SEARCH TERMS BY COUNTRY AND THEME |                                                                                                                                                                                                                                   |                                                                                                                                                                                                                                                                                  |
|----------------------------------------------------|-----------------------------------------------------------------------------------------------------------------------------------------------------------------------------------------------------------------------------------|----------------------------------------------------------------------------------------------------------------------------------------------------------------------------------------------------------------------------------------------------------------------------------|
| Term set                                           | Base set (authority terms + language)                                                                                                                                                                                             | COVID-19 search terms                                                                                                                                                                                                                                                            |
| Denmark                                            | ("Mette Frederiksen" OR statsminister OR statsministeren OR regering OR regeringen OR @RegeringDK) lang:da                                                                                                                        | (corona OR coronavirus OR covid19 OR covid-19 OR covid_19 OR #corona OR #coronavirus OR #coronacrisis OR #corona2020 OR #covid19 OR #covid-19 OR #covid_19 OR #covid19dk OR #covid19danmark OR #coronadk OR #coronadanmark OR #coronavirusk OR #coronavirusdanmark)              |
| Germany                                            | (Merkel OR Bundeskanzlerin OR Kanzlerin OR Regierung OR @AngelaMerkelCDU) -Österreich - österreichisch -österreichische - Bierlein -Bundeskanzler -ÖVP -Schweiz -schweizisch -schweizische - Sommaruga -Bundespräsidentin lang:de | (corona OR coronavirus OR covid19 OR covid-19 OR covid_19 OR #corona OR #coronavirus OR #coronacrisis OR #corona2020 OR #covid19 OR #covid-19 OR #covid_19 OR #covid19de OR #covid19deutschland OR #coronade OR #coronadeutschland OR #coronavirusde OR #coronavirusdeutschland) |
| The Netherlands                                    | (Rutte OR minister-president OR regering OR @MinPres) -Vlaanderen - vlaams -vlaamse -Jambon -Homans - Vervoort -België -belgisch -Brussels lang:nl                                                                                | (corona OR coronavirus OR covid19 OR covid-19 OR covid_19 OR #corona OR #coronavirus OR #coronacrisis OR #corona2020 OR #covid19 OR #covid-19 OR #covid_19 OR #covid19nl OR #covid19nederland OR #coronanl OR #coronanederland OR #coronavirusnl OR #coronavirusnederland)       |
| Sweden                                             | ("Stefan Löfven" OR statsminister OR statsministern OR regering OR regeringen OR @SwedishPM) lang:sv                                                                                                                              | (corona OR coronavirus OR covid19 OR covid-19 OR covid_19 OR #corona OR #coronavirus OR #coronacrisis OR #corona2020 OR #covid19 OR #covid-19 OR #covid_19 OR #covid19sv OR #covid19sverige OR #coronasv OR #coronasverige OR #coronavirussv OR #coronavirussverige)             |
