# Supplementary material for: Lockdowns, lethality, and laissez-faire politics. Public discourses on political authorities in high-trust countries during the COVID-19 pandemic
Source: PubMed Central journal article supplement (PMC8221506; doi:10.1371/journal.pone.0253175), 2021-06-23
Supplement: pone.0253175.s006.pdf [file pone.0253175.s006.pdf]

## S6 Appendix: Topic modeling results

Abbreviations:

Gov't=government

Rtw=retweet

DK: Denmark

DE: Germany

NL: The Netherlands

SE: Sweden

TABLE A1: DENMARK, PHASE 1 (K=20, ITERATIONS=2000, WORDS-PER-TOPIC=20, N=321<sup>1</sup>)

| Topic    | Wgt   | Topic words                                                                                                                                                                                                                                                                                                                                                                                                                  |
|----------|-------|------------------------------------------------------------------------------------------------------------------------------------------------------------------------------------------------------------------------------------------------------------------------------------------------------------------------------------------------------------------------------------------------------------------------------|
| Topic 1  | 0.239 | corona - dkpol - kan - regeringen - så - coronavirus - covid - regeringdk - regering - hvorfor - mere - godt - ved - dkmedier - hvordan                                                                                                                                                                                                                                                                                      |
| Topic 2  | 0.098 | mette - frederiksen - coronavirus - arrangementer - deltagere - covid - aflyses - mere - bør - danmark - aflyse - statsminister - <a href="https://ift.tt">https://ift.tt</a> - siger - dkpol                                                                                                                                                                                                                                |
| Topic 3  | 0.040 | regeringen - dkbiz - klar - regeringdk - covid - virksomheder - vigtigt - økonomisk - corona - dkøko - hjælpe - hjælp - erhvervslivet - danske - følger                                                                                                                                                                                                                                                                      |
| Topic 4  | 0.037 | covid - sundpol - dkpol - erhvervsliv - smittet - må - lønmodtagere - borger - få - danske - lave - sengepladser - folketinget - udviklingen - mødes                                                                                                                                                                                                                                                                         |
| Topic 5  | 0.031 | give - hånd - politisk - dansk - regeringen - corona - kompensation - snakke - pga - åbner - håndtryk - p.g.a - virussen - statsborger - penge                                                                                                                                                                                                                                                                               |
| Topic 6  | 0.030 | statsministeren - nye - coronavirus - tiltag - gå - inddæmme - coronavirus-hvornår-ser-statsministeren-gå - undtagelsestilstand - talerstolen - hvornår - ser - <a href="https://www.information.dk/indland/leder">https://www.information.dk/indland/leder</a> - varsler - t.co&utm_content - btn&utm_source                                                                                                                |
| Topic 7  | 0.029 | coronavirus - regeringen - italien - fordi - mest - indtil - undgå - forkert - afhænger - stoppe - viser - regeringens - smittede - panik - rammes                                                                                                                                                                                                                                                                           |
| Topic 8  | 0.028 | heunicke - regeringdk - statsmin - dkpol - coronavirus - sundpol - dkmedier - sstusundhed - dksundhed - ramt - gåafmette - rigspoliti - ansvar - <a href="https://www.danmarksfremtid.dk/mette-frederiksen-coronavirus-gåafheunicke">https://www.danmarksfremtid.dk/mette-frederiksen-coronavirus-gåafheunicke</a>                                                                                                           |
| Topic 9  | 0.026 | helt - får - dage - christiansborg - medier - enig - allerede - samme - ift - coronavirusdk - stoppet - bl.a - regering - flere - tysk                                                                                                                                                                                                                                                                                       |
| Topic 10 | 0.023 | samme - så - corona - influenza - virus - fugleinfluenza - forbindelse - siden - finde - efterfølgende - kina - steder - overfor - tiltag - bare                                                                                                                                                                                                                                                                             |
| Topic 11 | 0.023 | myndighederne - får - fly - få - rejse - norditalienere - italiens - fordi - døve - styr - sikkerhed - sted - mon - info - alternativet                                                                                                                                                                                                                                                                                      |
| Topic 12 | 0.022 | skoler - regeringen - lukke - coronavirus - grund - italien - universiteter - landet - italienske - lukket - rss - verden - udbruddet - seneste - italiens                                                                                                                                                                                                                                                                   |
| Topic 13 | 0.022 | bare - regeringen - dø - udsatte - koster - medierne - borgere - alligevel - ihjel - influenza - ældre - reagerer - tro - indsats - alm                                                                                                                                                                                                                                                                                      |
| Topic 14 | 0.022 | direktøren - ved - statsministeren - corona-virus - sstusundhed - covid - mindst - pressemøde - blod - adgang - erhvervsstyrelsen - udenrigsministeriet - borgerservice - organisation - rigspolitichefen                                                                                                                                                                                                                    |
| Topic 15 | 0.022 | mette - frederiksen - score - point - næsten - forholdsregler - mindske - selvom - stor - tager - hvorfor - utroligt - artikler - seriøst - score-nemme-point.html                                                                                                                                                                                                                                                           |
| Topic 16 | 0.019 | regeringdk - bør - viser - vores - smitte - lykkes - html - kommunikationstrategi - ændre - bag - psykologien - forsker - forskning - <a href="https://threadreaderapp.com/thread">https://threadreaderapp.com/thread</a> - m_b_petersen                                                                                                                                                                                     |
| Topic 17 | 0.018 | regering - mellemøsten - sammen - mens - sidder - børn - uge - tidligere - kommer - uden - kampe - <a href="https://m.economictimes.com/news/international/world-news/in-coronavirus-fight-china-gives-citizens-a-color-code-with-red-flags/articleshow">https://m.economictimes.com/news/international/world-news/in-coronavirus-fight-china-gives-citizens-a-color-code-with-red-flags/articleshow</a> - bus - lov - afgør |
| Topic 18 | 0.017 | lige - håndtere - dine - vide - iwar - statsborgere - absurd - dennis - forstår - par - økonomisk - sundhedsstyrelsen - udlandet - statsoverhovedet - danmarks                                                                                                                                                                                                                                                               |
| Topic 19 | 0.013 | håndtryk - stop - stedet - uden - regeringdk - forklaring - term - forurening - flygtninge - statsborgerskab - hænder - før - krav - politikerne - demonstration                                                                                                                                                                                                                                                             |
| Topic 20 | 0.012 | begynder - spille - kort - åbne - lukke - helt - regeringen - bne-kort - ndr-r-kurs - regeringen-%c - corona-krisen-kan-lukke-samfundet-helt - <a href="https://politiken.dk/debat/kroniken/art">https://politiken.dk/debat/kroniken/art</a> - kurs - ændrer - corona-krisen                                                                                                                                                 |

<sup>1</sup> Please note that the cleaned sample size differs slightly from sentiment analysis results, since a few results were excluded from the sentiment analysis due to program error, while some results had to be excluded from the topic modeling analysis, if the same person had written the same things repeatedly in order to avoid entire topics coming out as the result of a single tweet.

| TABLE A2: DENMARK, PHASE 2 (K=20, ITERATIONS=2000, WORDS-PER-TOPIC=20, N=2460) |                                                            |       |                                                                                                                                                                                                                                                                                                                                                      |
|--------------------------------------------------------------------------------|------------------------------------------------------------|-------|------------------------------------------------------------------------------------------------------------------------------------------------------------------------------------------------------------------------------------------------------------------------------------------------------------------------------------------------------|
|                                                                                | Topic                                                      | Wgt   | Topic words                                                                                                                                                                                                                                                                                                                                          |
| Topic 1                                                                        | <b>COVID-19 and the gov't</b>                              | 0.336 | covid - så - regeringen - dkpol - corona - kan - regeringdk - coronadk - må - ved - regering - coronavirus - dkmedier - danmark - hvorfor -                                                                                                                                                                                                          |
| Topic 2                                                                        | <b>Thank yous + solidarity</b>                             | 0.133 | covid - regeringdk - tak - regeringen - dkpol - corona - sammen - statsministeren - kan - hinanden - stor - vores - godt - andre - tage -                                                                                                                                                                                                            |
| Topic 3                                                                        | <b>Praise for prime minister</b>                           | 0.116 | mette - frederiksen - covid - dkpol - statsminister - coronadk - vores - pressemøde - respekt - lige - coronavirusdk - tak - dkmedier - tale - godt -                                                                                                                                                                                                |
| Topic 4                                                                        | <b>Bailout</b>                                             | 0.085 | dkpol - covid - regeringen - regeringdk - virksomheder - dkbiz - kan - selvstændige - hjælp - dansk - hjælpepakke - hjælpe - danske - små - nye -                                                                                                                                                                                                    |
| Topic 5                                                                        | <b>Gov't failed</b>                                        | 0.082 | dkmedier - dkpol - covid - regeringdk - eudk - statsmin - sstsunhed - fejlet - heunicke - <a href="https://www.danmarksfremtid.dk/coronavirus-danske-medier">https://www.danmarksfremtid.dk/coronavirus-danske-medier</a> - svigtet - ansvar - <a href="https://www.danmarksfremtid.dk">https://www.danmarksfremtid.dk</a> - sstbrostrom - ledelse - |
| Topic 6                                                                        | <b>Frederiksen: do social distancing, do not panic buy</b> | 0.052 | statsministeren - covid - hamstre - må - coronavirusdk - handle - danskerne - hold - danskere - folk - afstand - hamstring - dronningen - sagde - mennesker -                                                                                                                                                                                        |
| Topic 7                                                                        | <b>Lockdown</b>                                            | 0.050 | covid - lukker - coronavirus - regeringen - danmark - statsministeren - grænser - lukket - hjem - siger - skoler - dag - morgen - danske - april -                                                                                                                                                                                                   |
| Topic 8                                                                        | <b>New containment measures</b>                            | 0.048 | mette - frederiksen - coronavirus - statsminister - danmark - pressemøde - aften - covid - nye - onsdag - tiltag - dk/samfund - corona - personer - kommer -                                                                                                                                                                                         |
| Topic 9                                                                        | <b>Press conference</b>                                    | 0.037 | dkpol - covid - mere - regeringdk - statsministeren - marts - læs - <a href="http://coronasmitte.dk">http://coronasmitte.dk</a> - <a href="https://www.regeringen.dk/nyheder/pressemøde">https://www.regeringen.dk/nyheder/pressemøde</a> - spejlsalen - regeringen - personer - undskyld - pressemøde - danmark -                                   |
| Topic 10                                                                       | <b>Tripartite agreement</b>                                | 0.031 | regeringen - coronavirus - parter - arbejdsmarkedets - trepartsaftale - vidtgående - job - regering - model - folketinget - lønmodtagere - giver - miste - danske - lovforslag -                                                                                                                                                                     |
| Topic 11                                                                       | <b>Strategy: COVID-19 vs. climate crisis</b>               | 0.029 | corona - regeringen - regering - ved - tilbage - dkgreen - regningen - penge - hjælp - klima - uden - skat - klimakrisen - folketing - pension -                                                                                                                                                                                                     |
| Topic 12                                                                       | <b>Risks of different containment strategies</b>           | 0.028 | regering - usa - svenske - sverige - folkestyret - spiller - coronakrisen - forsøger - frygt - lars - så - kina - nationen - præsident - trump -                                                                                                                                                                                                     |
| Topic 13                                                                       | <b>Call for ban on large events</b>                        | 0.028 | regering - flere - covid - forsamlinger - kræver - liste - dødsfald - fået - flertal - hvilke - oplysninger - sygdom - gennem - forbud - corona-virus -                                                                                                                                                                                              |
| Topic 14                                                                       | <b>Prime minister YouTube video</b>                        | 0.027 | unge - statsministeren - spørgsmål - vigtigt - byx-mxz - corona - youtube - <a href="https://youtu.be/p">https://youtu.be/p</a> - rasmus - paludan - svarer - hver - ide - demokrati - egne -                                                                                                                                                        |
| Topic 15                                                                       | <b>Compulsory admission</b>                                | 0.026 | dkpol - regeringdk - dkmedier - covid - coronavirus - uden - adgang - hjem - venstredk - private - jakobellemann - coronavirusdk - sanktioner - lade - enhedslisten -                                                                                                                                                                                |
| Topic 16                                                                       | <b>COVID-19 in developing countries</b>                    | 0.026 | kan - millioner - coronavirus - regeringen - smitter - dø - så - kun - virus - corona-støtte - behandling - giver - mio - mennesker - smitte -                                                                                                                                                                                                       |
| Topic 17                                                                       | <b>Criticism of gov't communication, leadership</b>        | 0.024 | covid - regeringdk - dkbiz - hamstring - statsmin - dkmedier - dkpol - <a href="https://www.danmarksfremtid.dk/coronavirus-danmark-hamstring">https://www.danmarksfremtid.dk/coronavirus-danmark-hamstring</a> - ledelse - kommunikation - sundpol - dårlig - nød - aldrig - ellers -                                                                |
| Topic 18                                                                       | <b>Single Twitter user</b>                                 | 0.024 | corona - regeringen - nye - artikler - svar - artikel - millionerudfordring - hercules.blogspot.com - <a href="https://den">https://den</a> - tidligt - berlingske - dkbiz - danmark - jydsk - politiken - vestkysten -                                                                                                                              |
| Topic 19                                                                       | <b>Gov't is deceptive (rtw: article)</b>                   | 0.018 | corona - danskerne - test - regeringen - lyset - bag - mere - taler - teststrategi - offensiv - %c - avis - korte - brug - skrevet -                                                                                                                                                                                                                 |
| Topic 20                                                                       | <b>Asylum seekers DK vs. DE</b>                            | 0.018 | corona - smittet - asylansøgere - grund - tyskland - danske - asylstop - regering - marts - intet - gør - smittefaren - grænsen - avis - korte -                                                                                                                                                                                                     |

TABLE A3: DENMARK, PHASE 3 (K=20, ITERATIONS=2000, WORDS-PER-TOPIC=20, N=1001)

|          | Topic                                                       | Wgt   | Topic words                                                                                                                                                                                                                                 |
|----------|-------------------------------------------------------------|-------|---------------------------------------------------------------------------------------------------------------------------------------------------------------------------------------------------------------------------------------------|
| Topic 1  | <b>Reopening</b>                                            | 0.601 | covid - dkpol - regeringen - kan - corona - så - regeringdk - danmark - coronadk - statsministeren - mere - godt - må - ved - åbne -                                                                                                        |
| Topic 2  | <b>Press conference</b>                                     | 0.109 | mette - frederiksen - coronavirus - danmark - mette-frederiksen - berlingske - coronakrisen - går - jyske - pressemøde - ssi - sundhed - altinget - vestkysten - derfor -                                                                   |
| Topic 3  | <b>Containment strategy and the elderly</b>                 | 0.096 | corona - regeringen - plan - ved - år - hvem - stille - ældre - dør - test - lige - gør - fordi - taler - spørgsmål -                                                                                                                       |
| Topic 4  | <b>Media as propaganda channels</b>                         | 0.090 | dkmedier - dkpol - covid - regeringdk - eudk - statsmin - <a href="https://www.edtwodthnb.dk">https://www.edtwodthnb.dk</a> - sstsunhed - propaganda - newsdk - mikrofonholderi - spin - dag - kommunikation - presselogen -                |
| Topic 5  | <b>Schools reopening: COVID-19-infected homes</b>           | 0.054 | børn - regeringen - skole - hjemmet - møde - forældre - vigtigt - tak - presset - daginstitutioner - besluttet - børnene - skolen - starte - smitte -                                                                                       |
| Topic 6  | <b>Healthcare sector reopening</b>                          | 0.040 | regeringen - sundhedsvæsenet - aften - antallet - smittede - vores - danske - kommunerne - aftalt - lille - presse - aftale - velfærdslov - flertal - regionerne -                                                                          |
| Topic 7  | <b>Strategy for vulnerable citizens</b>                     | 0.038 | regeringen - sårbare - udsatte - stærkt - rette - initiativer - venstre - lederskab - særligt - finde - hjælp - sundheds - risiko - dksocial - kommende -                                                                                   |
| Topic 8  | <b>Bailout for sports clubs</b>                             | 0.038 | store - joymogensen - støtte - handler - gennem - pga - dybt - danske - personer - hjælp - kulturmin - besluttet - september - forsamlinger - sætter -                                                                                      |
| Topic 9  | <b>Business bailout expansion</b>                           | 0.035 | covid - regeringen - dkpol - dkbiz - partier - folketingets - <a href="https://www.regeringen.dk/nyheder">https://www.regeringen.dk/nyheder</a> - enige - mere - justere - direktør - regeringdk - erhverv - dansk-økonomi - indgået -      |
| Topic 10 | <b>No faith in gov't, gov't power hungry</b>                | 0.034 | statsministeren - tillid - politisk - magt - skridt - danskerne - sagt - frygt - kritisk - ansvar - leder - reglerne - talt - sst - overfor -                                                                                               |
| Topic 11 | <b>Citizenship ceremonies without handshakes</b>            | 0.034 | regeringen - håndtryk - grundlovsceremonier - mattiastesfaye - udlændinge - midlertidigt - suspendere - nye - integrationsministeriet - nemlig - gør-danskerne - hold-afstand-lød-rådet-så - håndtrykket - spolitik - suspendere-håndtryk - |
| Topic 12 | <b>International strategies</b>                             | 0.031 | coronavirus - regering - italien - kære - landets - respekt - spanien - restauranter - masker - arbejdsskade - stor - britiske - caféer - frankrig - upassende -                                                                            |
| Topic 13 | <b>Criticism from Lars Løkke</b>                            | 0.031 | løkke - lars - egen - sendt - situation - fanget - information - bør - føre - vacciner - <a href="https://politiken.dk/indland/art">https://politiken.dk/indland/art</a> - debat - lige - rasmussen - egne -                                |
| Topic 14 | <b>Gov't and prime minister show leadership</b>             | 0.031 | venstre - radikale - regeringen - venstredk - dansk - står - strategien - sfpolitik - enhedslisten - spolitik - lyder - opposition - hånd - mandater - suk -                                                                                |
| Topic 15 | <b>Swedish strategy</b>                                     | 0.030 | usa - forskere - sammen - sektor - bruger - sverige - klima - lader - svenske - sej - slå - må - private - følge - mens -                                                                                                                   |
| Topic 16 | <b>Single Twitter user</b>                                  | 0.028 | index.htm - spørgsmål/s - <a href="https://www.ft.dk/samling">https://www.ft.dk/samling</a> - tro - følger - faktisk - hvordan - sundpol - sundhedssystemet - udviklingen - påstår - erhvervsminister - ministeren - stiller - bruges -     |
| Topic 17 | <b>Raeson.dk articles</b>                                   | 0.027 | regering - coronakrisen - løn - <a href="https://www.raeson.dk">https://www.raeson.dk</a> - coronakrise - coronadk - gratis - kommentar - glad - solidaritet - zealands - dkpol - raesonekstra - abir - procent -                           |
| Topic 18 | <b>New Zealand gov't takes paycut</b>                       | 0.025 | vild - iwar - anbefaling - forskellige - folkets - tæt - slår - præcis - opfordring - udløser - folket - næsten - https - simpelt - svenskerne -                                                                                            |
| Topic 19 | <b>Poland bans abortion</b>                                 | 0.025 | økonomisk - gøre - flygtninge - mht - polen - danskindustri - tiltag - påfaldende - tragedie - medlemmer - netop - corona-krisen - forhindre - abort - heldigvis -                                                                          |
| Topic 20 | <b>Children back in school, comply with proper behavior</b> | 0.024 | statsminister - giver - april - virus - børnenes - børnene - indvandrere - avis - jeres - stikken - imponeret - genåbnet - vildt - forklaring - skole -                                                                                     |

| <b>TABLE B1: GERMANY, PHASE 1 (K=20, ITERATIONS=2000, WORDS-PER-TOPIC=20, N=6124)</b> |                                                   |            |                                                                                                                                                                                                                                                          |
|---------------------------------------------------------------------------------------|---------------------------------------------------|------------|----------------------------------------------------------------------------------------------------------------------------------------------------------------------------------------------------------------------------------------------------------|
|                                                                                       | <b>Topic</b>                                      | <b>Wgt</b> | <b>Topic words</b>                                                                                                                                                                                                                                       |
| Topic 1                                                                               | <b>COVID-19 in DE</b>                             | 0.305      | regierung - coronavirus - corona - covid - deutschland - virus - mehr - schon - mal - china - menschen - deutsche - gibt - merkel - immer -                                                                                                              |
| Topic 2                                                                               | <b>Turkey breaks migration pact</b>               | 0.156      | merkel - corona - coronavirus - frau - deutschland - kanzlerin - cdu - covid - türkei - flüchtlinge - eigentlich - coronavirusde - mal - grenzen - schon -                                                                                               |
| Topic 3                                                                               | <b>The Minister of Health</b>                     | 0.061      | covid - merkel - coronavirus - spahn - coronavirusde - jensspahn - deutschland - gesundheitsminister - coronavirusdeutschland - regierung - die_regierung - jens - coronadeutschland - bundesregierung - sarscov -                                       |
| Topic 4                                                                               | <b>COVID-19 in Northern Italy</b>                 | 0.047      | regierung - coronavirus - italien - html - zahl - millionen - menschen - quarantäne - norden - betroffen - wegen - lomalbardei - covid - italienische - gebiete -                                                                                        |
| Topic 5                                                                               | <b>Italy: containment measures</b>                | 0.035      | regierung - coronavirus - schulen - italien - wegen - covid - abgesagt - märz - veranstaltungen - html - maßnahmen - geschlossen - großveranstaltungen - ausbreitung - frankreich -                                                                      |
| Topic 6                                                                               | <b>COVID-19 in China</b>                          | 0.034      | regierung - coronavirus - china - html - wuhan - chinesische - peking - infizierte - chinesischen - chinas - folgen - virus - wut - schweigen - erster -                                                                                                 |
| Topic 7                                                                               | <b>Seehofer denies handshake with Merkel</b>      | 0.032      | merkel - coronavirus - seehofer - angela - hand - corona - verweigert - grund - cdu - bundeskanzlerin - https://www - kanzlerin - berlin - wegen - handschlag -                                                                                          |
| Topic 8                                                                               | <b>Italy: lockdown</b>                            | 0.031      | regierung - coronavirus - italien - italienische - wegen - städte - abriegeln - ausbreitung - land - maßnahmen - ganze - infektionen - drastischen - html - zwei -                                                                                       |
| Topic 9                                                                               | <b>COVID-19 internationally</b>                   | 0.030      | regierung - coronavirus - covid - iran - neue - warum - polen - chinesische - gibt - mktcid - youtube - corona - gefühl - iranische - afjfff -                                                                                                           |
| Topic 10                                                                              | <b>Merkel incompetent</b>                         | 0.027      | regierung - coronavirus - merkel - deutschland - tun - china - angesichts - inkompetent - wahrscheinlich - fall - weiterhin - erst - schauen - denke - notstand -                                                                                        |
| Topic 11                                                                              | <b>Lack of communication from chancellor</b>      | 0.027      | merkel - corona - frau - kanzlerin - corona-virus - angela - twttr.shr - coronavirus - schaffen - bild.html - krise - sprechen - vertrauen - warum - bild.html?wtmc -                                                                                    |
| Topic 12                                                                              | <b>Virologist: containment measures necessary</b> | 0.026      | regierung - coronavirus - covid - youtube - maßnahmen - vorsorge - coronavirus- ausbreitung - japanische - berichtet - virologe - infiziert - beruhigt - japan - chinesischen - html -                                                                   |
| Topic 13                                                                              | <b>Global fatalities</b>                          | 0.022      | coronavirus - regierung - menschen - macht - millionen - sterben - weltweit - html - kranke - umgang - alte - journalismus - hl_diff - alten - ältere -                                                                                                  |
| Topic 14                                                                              | <b>Call for Chancellor to take the lead</b>       | 0.021      | coronavirus - regierung - Twitter#echobox - chinesische - chefsache - kampf - autofeed&utm_medium - social&utm_source - utm_term - umgang - fdp - kritisiert - fpö - folgen - utm_source -                                                               |
| Topic 15                                                                              | <b>China: strategy and economy</b>                | 0.020      | maß - mitte - merkel - coronavirus - welt - vorgehen - socialmedia.Twitter.shared.web - hongkong - regierung - wirtschaft - https://www.welt.de/vermischtes/article - legt - umgang - fest - https://www.welt.de/wirtschaft/article -                    |
| Topic 16                                                                              | <b>Gov't overwhelmed*</b>                         | 0.019      | regierung - coronavirus - steht - veröffentlicht - chinas - tonline_news - html - afrika - versagt - führung - kämpft - trauen - faznet - krise - zeigt -                                                                                                |
| Topic 17                                                                              | <b>COVID-19 in the US</b>                         | 0.019      | virus - trump - status - corona - kampf - kontrolle - sogar - regierung - https://Twitter.com/isabelvillalon - merkel's - geht - usa - steckt - donald - scheiße -                                                                                       |
| Topic 18                                                                              | <b>Conspiracy: gov't secret plan</b>              | 0.017      | regierung - corona - entdeckt - geheimplan - ausbruch - corona-geheimplan - covid - corona-folgen - regierung-entdeckt - https://www.wallstreet-online.de/nachricht - corona-geheimplan-regierung-entdeckt - lange - prüft - konjunkturprogramm - ende - |
| Topic 19                                                                              | <b>Conspiracy: NWO</b>                            | 0.016      | merkel - wuhan - hält - coronavirus-ausbruch - nwo-rede - kurz - coronavirus - nmy - youtube - https://youtu.be/chyndj - itb - html - ungar - erstmals - iran -                                                                                          |
| Topic 20                                                                              | <b>Climate change and migration</b>               | 0.016      | deutsche - reisewarnung - wegen - lebensmittel - coronavirus - forschungsministerin - klimawandel - südtirols - heute - nwo - bringen - corona-krise - sollen - migrationspakt - hamburg -                                                               |

| <b>TABLE B2: GERMANY, PHASE 2 (K=20, ITERATIONS=2000, WORDS-PER-TOPIC=20, N=26107)</b> |                                                       |            |                                                                                                                                                                                                                                                                                                                                                                                                                                                                                                                                                                                                                                                                         |
|----------------------------------------------------------------------------------------|-------------------------------------------------------|------------|-------------------------------------------------------------------------------------------------------------------------------------------------------------------------------------------------------------------------------------------------------------------------------------------------------------------------------------------------------------------------------------------------------------------------------------------------------------------------------------------------------------------------------------------------------------------------------------------------------------------------------------------------------------------------|
|                                                                                        | <b>Topic</b>                                          | <b>Wgt</b> | <b>Topic words</b>                                                                                                                                                                                                                                                                                                                                                                                                                                                                                                                                                                                                                                                      |
| Topic 1                                                                                | <b>COVID-19 in DE</b>                                 | 0.154      | corona - regierung - merkel - covid - menschen - coronavirus - mehr - mal - schon - leute - frau - immer - warum - coronavirusde - bitte -                                                                                                                                                                                                                                                                                                                                                                                                                                                                                                                              |
| Topic 2                                                                                | <b>Call for political action</b>                      | 0.137      | merkel - covid - regierung - corona - coronavirus - deutschland - maßnahmen - coronadeutschland - spahn - schon - coronavirusde - geht - wäre - handeln - kanzlerin -                                                                                                                                                                                                                                                                                                                                                                                                                                                                                                   |
| Topic 3                                                                                | <b>Merkel holds speech</b>                            | 0.117      | merkel - covid - coronavirus - coronavirusdeutschland - corona - bundeskanzlerin - frau - kanzlerin - coronavirusde - ansprache - angela - rede - coronakrise - deutschland - coronadeutschland -                                                                                                                                                                                                                                                                                                                                                                                                                                                                       |
| Topic 4                                                                                | <b>Gov't vs. AfD</b>                                  | 0.094      | corona - merkel - regierung - coronavirus - afd - schon - seit - virus - mal - mehr - covid - krise - wer - frau - deutschland -                                                                                                                                                                                                                                                                                                                                                                                                                                                                                                                                        |
| Topic 5                                                                                | <b>Borders stay open for asylum seekers</b>           | 0.055      | merkel - grenzen - deutschland - coronavirus - covid - corona - schließen - schulen - coronavirusde - dicht - mehr - regierung - wegen - grenze - flüchtlinge -                                                                                                                                                                                                                                                                                                                                                                                                                                                                                                         |
| Topic 6                                                                                | <b>Curfew</b>                                         | 0.048      | regierung - coronavirus - maßnahmen - covid - wegen - ausbreitung - ausgangssperre - kampf - bleiben - geschlossen - heute - mehr - corona - spanien - weitere -                                                                                                                                                                                                                                                                                                                                                                                                                                                                                                        |
| Topic 7                                                                                | <b>COVID-19 internationally</b>                       | 0.044      | regierung - coronavirus - covid - china - deutschland - corona - italien - merkel - virus - zahl - fälle - mehr - millionen - wuhan - html -                                                                                                                                                                                                                                                                                                                                                                                                                                                                                                                            |
| Topic 8                                                                                | <b>Press conference: new containment measures</b>     | 0.044      | merkel - coronavirus - bundeskanzlerin - pressekonferenz - maßnahmen - länder - angela - kanzlerin - corona - covid - live - uhr - ministerpräsidenten - corona-krise - heute -                                                                                                                                                                                                                                                                                                                                                                                                                                                                                         |
| Topic 9                                                                                | <b>Business bailout</b>                               | 0.035      | regierung - coronavirus - corona-krise - corona - wirtschaft - html - unternehmen - plant - euro - milliarden - kredite - hilfspaket - covid - folgen - wegen -                                                                                                                                                                                                                                                                                                                                                                                                                                                                                                         |
| Topic 10                                                                               | <b>Merkel exposed to COVID-19</b>                     | 0.034      | merkel - quarantäne - coronavirus - kontakt - kanzlerin - angela - bundeskanzlerin - arzt - getestet - positiv - corona-infiziertem - wegen - negativ - html - wurde -                                                                                                                                                                                                                                                                                                                                                                                                                                                                                                  |
| Topic 11                                                                               | <b>Merkel: "Es ist ernst"</b>                         | 0.033      | merkel - corona-krise - angela - bundeskanzlerin - ernst - html - coronavirus - fernsehansprache - kanzlerin - Twitter - ansprache - nehmen - deutsche - abend - hält -                                                                                                                                                                                                                                                                                                                                                                                                                                                                                                 |
| Topic 12                                                                               | <b>Tim Kellner videos (alt right activist)</b>        | 0.029      | merkel - coronavirus - angela - youtube - kontakte - sozialkontakte - covid - corona - corona-krise - soziale - verzichten - tim - kellner - möglich - <a href="https://youtu.be">https://youtu.be</a> -                                                                                                                                                                                                                                                                                                                                                                                                                                                                |
| Topic 13                                                                               | <b>Political parties</b>                              | 0.028      | merkel - cdu - covid - spd - corona - coronavirus - csu - spahn - deutschland - coronavirusde - fdp - afd - grüne - söder - coronavirusdeutschland -                                                                                                                                                                                                                                                                                                                                                                                                                                                                                                                    |
| Topic 14                                                                               | <b>Merkel: 60-70% of all Germans will be infected</b> | 0.024      | merkel - coronavirus - deutschland - prozent - welt - corona-krise - corona - regierung - html - infizieren - Twitter#echobox - angela - social&utm_source - krise - tun -                                                                                                                                                                                                                                                                                                                                                                                                                                                                                              |
| Topic 15                                                                               | <b>Protection of the population</b>                   | 0.023      | regierung - corona - covid - wegen - coronavirus - html - krise - mehr - demokratie - schützen - welt - müssen - merkel - besonders - corona-krise -                                                                                                                                                                                                                                                                                                                                                                                                                                                                                                                    |
| Topic 16                                                                               | <b>No communication from the gov't (rtw: article)</b> | 0.021      | kanzlerin - merkel - twttr.shr - corona - coronavirus - corona-krise - rede - bild.html - führung - bild.html?wtmc - auftritt - regierung - bild - krise - kommentar -                                                                                                                                                                                                                                                                                                                                                                                                                                                                                                  |
| Topic 17                                                                               | <b>Merkel: COVID-19 is an immense challenge</b>       | 0.021      | merkel - solidarität - corona-krise - seit - coronavirus - herausforderung - weltkrieg - größte - probe - kanzlerin - zweiten - corona - covid - html - hilferuf -                                                                                                                                                                                                                                                                                                                                                                                                                                                                                                      |
| Topic 18                                                                               | <b>COVID-19 and Donald Trump</b>                      | 0.018      | regierung - trump - coronavirus - usa - corona - merkel - bla - deutsche - donald - versucht - impfstoff - welt - curevac - covid - sichern -                                                                                                                                                                                                                                                                                                                                                                                                                                                                                                                           |
| Topic 19                                                                               | <b>Crisis support to the cultural sector (rtw)</b>    | 0.013      | coronavirus - regierung - merkel - kultur - bureg - covid - reagieren - unterstützung - kulturstaatsministerin - grütters - <a href="https://www.bundesregierung.de/bregde/-bundesregierung/staatsministerin">https://www.bundesregierung.de/bregde/-bundesregierung/staatsministerin</a> - verspricht - notlagen - künftlern - härtefälle-reagieren -                                                                                                                                                                                                                                                                                                                  |
| Topic 20                                                                               | <b>Gov't and federal Länder make agreement</b>        | 0.009      | bundesregierung - deutschland - regierungschefs - corona-epidemie - regierungschefinnen - merkel - bureg - angesichts - bundesländer - bundesländer-angesichts - vereinbarung <a href="https://www.bundesregierung.de/bregde/aktuelles/vereinbarung">https://www.bundesregierung.de/bregde/aktuelles/vereinbarung</a> - <a href="https://www.bundesregierung.de/bregde/themen/buerokratieabbau/vereinbarung">https://www.bundesregierung.de/bregde/themen/buerokratieabbau/vereinbarung</a> - <a href="https://www.bundesregierung.de/breg-de/themen/coronavirus/besprechung">https://www.bundesregierung.de/breg-de/themen/coronavirus/besprechung</a> - besprechung - |

| TABLE B3: GERMANY, PHASE 3 (K=20, ITERATIONS=2000, WORDS-PER-TOPIC=20, N=7268) |                                                                                 |       |                                                                                                                                                                                                                                                                    |
|--------------------------------------------------------------------------------|---------------------------------------------------------------------------------|-------|--------------------------------------------------------------------------------------------------------------------------------------------------------------------------------------------------------------------------------------------------------------------|
|                                                                                | Topic                                                                           | Wgt   | Topic words                                                                                                                                                                                                                                                        |
| Topic 1                                                                        | <b>COVID-19 in DE</b>                                                           | 0.201 | corona - regierung - merkel - covid - mehr - schon - coronavirus - immer - menschen - deutschland - gibt - mal - kommt - seit - viele -                                                                                                                            |
| Topic 2                                                                        | <b>COVID-19 in Nordrhein-Westfalen</b>                                          | 0.139 | merkel - corona - covid - mal - frau - regierung - laschet - gut - coronavirusde - macht - kanzlerin - coronavirus - wer - afd - heute -                                                                                                                           |
| Topic 3                                                                        | <b>Merkel makes statement</b>                                                   | 0.067 | merkel - angela - regierungserklärung - bundeskanzlerin - kanzlerin - corona-krise - coronavirus - bundestag - covid - forsch - lange - pandemie - kritisiert - corona - lockerungen -                                                                             |
| Topic 4                                                                        | <b>Öffnungsdiskussionsorgien (opening discussion orgies) (Merkel statement)</b> | 0.051 | merkel - öffnungsdiskussionsorgien - html - coronavirus - lockerungen - kanzlerin - kritisiert - warnt - kritik - angela - corona-lockerungen - corona - corona-maßnahmen - länder - bundeskanzlerin -                                                             |
| Topic 5                                                                        | <b>Compulsory facemasks in NRW</b>                                              | 0.050 | covid - merkel - deutschland - coronavirus - coronavirusde - corona - coronakrise - coronavirusdeutschland - lockdown - frau - html - politik - maskenpflicht - raus - cdu -                                                                                       |
| Topic 6                                                                        | <b>Austrian gov't takes paycut</b>                                              | 0.038 | regierung - corona - cdu - spd - corona-krise - csu - wegen - covid - kurz - geht - maßnahmen - deutschland - grünen - österreich - deutsche -                                                                                                                     |
| Topic 7                                                                        | <b>Reopening</b>                                                                | 0.037 | regierung - covid - coronavirus - maßnahmen - corona - april - mai - ende - krise - lockierung - corona-maßnahmen - wer - https://bit.ly - wochen - fordert -                                                                                                      |
| Topic 8                                                                        | <b>COVID-19 origin</b>                                                          | 0.037 | coronavirus - regierung - merkel - wuhan - sekunde - china - sicherheit - corona-krise - wiegen - html - ausbruch - trump - covid - welt - warum -                                                                                                                 |
| Topic 9                                                                        | <b>Compulsory facemasks</b>                                                     | 0.035 | regierung - maskenpflicht - covid - masken - corona - coronavirus - spahn - maske - merkel - html - tragen - virus - krise - gesundheitsministerium - coronadeutschland -                                                                                          |
| Topic 10                                                                       | <b>Gov't line vs. expert recommendations</b>                                    | 0.028 | merkel - corona - prof - covid - youtube - kanzlerin - lockdown - corona-krise - neue - https://www.youtube.com/watch?v - rki - rki-zahlen - widersprechen - gates - homburg -                                                                                     |
| Topic 11                                                                       | <b>Corona bonds</b>                                                             | 0.027 | merkel - corona - angela - europa - corona-krise - politik - corona-bonds - italien - deutschland - geht - kontrolle - bundeskanzlerin - macron - solidarität - bereit -                                                                                           |
| Topic 12                                                                       | <b>Conspiracy: Merkel and China created COVID-19</b>                            | 0.023 | coronavirus - merkel - schützt - labor - nrw - chinesischem - https://youtu.be - youtube - mgz - qxbi - laschet - regierung - öffnen - schulen - armin -                                                                                                           |
| Topic 13                                                                       | <b>Öffnungsdiskussionsorgien (opening discussion orgies) (Merkel statement)</b> | 0.023 | merkel - welt - corona-lockerungen - https://www.welt.de/politik/deutschland/article - streit - kanzlerin - kritisiert - ton - bundesländer - socialmedia.Twitter.shared.web - öffnungsdiskussionsorgien - vergreift - lockerungen - kanzlerin-vergreift - wegen - |
| Topic 14                                                                       | <b>Criticism of gov't by Jens Lehmann</b>                                       | 0.022 | regierung - merkel - frau - covid - geld - corona-politik - jens - mehr - kritisiert - bravo - lehmann - genre - betreff - youtube - corona-pandemie -                                                                                                             |
| Topic 15                                                                       | <b>Criticism of gov't by Sciencefiles.org</b>                                   | 0.022 | regierung - corona - corona-krise - merkel - macht - html - kippt - folgen - shutdown - energiewende - probleme - corona-heiligssprechung - neue - https://www.t-online.de/nachrichten/deutschland/id - schließt -                                                 |
| Topic 16                                                                       | <b>Gov't rhetoric of fear (rtw: article)</b>                                    | 0.020 | regierung - angst - html - merkel - corona-starre - deutschen - politik - Twitter - focus-kolumne - utm_source - news - html?rnd - versetzt - live-ticker - bürger -                                                                                               |
| Topic 17                                                                       | <b>Virologist: reopening is the wrong signal</b>                                | 0.017 | lockerungen - welle - regierung - gesendet - zweite - signal - falsches - cdefc - falsches-signal-gesendet-a-af - https://www.spiegel.de/wissenschaft/-medizin/corona-zweite-welle-regierung - covid - derspiegel - corona - spiegel - updayde -                   |
| Topic 18                                                                       | <b>Online petition for climate friendly financial aid</b>                       | 0.017 | merkel - angela - stellen - zukunft - menschen - Twitter - bundeskanzlerin - fordere - zentrum - greenrecovery - corona-rettungspläne - online-petition - wwf_deutschland - gruenekonjunktur&utm_source - share&utm_campaign -                                     |
| Topic 19                                                                       | <b>Linke: give financial aids to illegals</b>                                   | 0.017 | menschen - merkel - euro - fordern - seehofer - linke - corona-hilfe - papiere - corona - regierung - dad - fc-a - papiere-a-f - euro-hilfe - https://www.spiegel.de/politik/deutschland/corona-virus-linken-politiker-fordern -                                   |
| Topic 20                                                                       | <b>Chancellor power hungry (rtw)</b>                                            | 0.016 | rande - kubicki - kanzlerin - merkels - corona-politik - bewegt - amtsanmassung - cdbd - amtsanmassung-a-fdfabd - kanzlerin-bewegt - https://www.spiegel.de/politik/deutschland/wolfgang-kubicki - grundrechte - derspiegel - regelungskompetenzen - masst -       |

TABLE C1: THE NETHERLANDS, PHASE 1 (K=20, ITERATIONS=2000, WORDS-PER-TOPIC=20, N=3321)

|          | Topic                                                 | Wgt   | Topic words                                                                                                                                                                                                                     |
|----------|-------------------------------------------------------|-------|---------------------------------------------------------------------------------------------------------------------------------------------------------------------------------------------------------------------------------|
| Topic 1  | <b><i>Call for political action</i></b>               | 0.300 | minpres - rivm - coronavirus - covid - rutte - nederland - corona - coronavirusnederland - maatregelen - mensen - coronavirusnl - italie - regering - gaan - gaat                                                               |
| Topic 2  | <b><i>Hand shaking</i></b>                            | 0.156 | rutte - handen - coronavirus - schudden - coronanederland - persconferentie - corona - hand - covid - minpres - rivm - nederland - handenschudden - premier - mark                                                              |
| Topic 3  | <b><i>Patient care, the elderly</i></b>               | 0.115 | corona - regering - mensen - coronavirus - virus - gaan - ouderen - griep - rutte - dood - patienten - gaat - goed - laten - hele                                                                                               |
| Topic 4  | <b><i>Turkey breaks migration pact</i></b>            | 0.075 | corona - rutte - coronavirus - virus - grenzen - minpres - vvd - dicht - gaat - europa - land - turkije - open - crisis - krijgen                                                                                               |
| Topic 5  | <b><i>COVID-19 in Brabant</i></b>                     | 0.062 | coronavirus - thuis - evenementen - covid - mogelijk - werken - brabant - maatregelen - blijven - indamfase - coronanederland - scholen - grote - gaan                                                                          |
| Topic 6  | <b><i>Infectivity, lethality of COVID-19</i></b>      | 0.041 | corona - mensen - getest - week - testen - ziekenhuis - patient - test - besmet - blok - ligt - quarantaine - kom - lang - thuis                                                                                                |
| Topic 7  | <b><i>Gov't prioritizes economy</i></b>               | 0.034 | rutte - corona - telegraaf - Twitter - referral&utm_campaign - t.co&utm_medium - https://www.telegraaf.nl/t - stootje - corona-patienten - verkeerde - stelt - https://www.telegraaf.nl/nieuws - prioriteit - kwijt - nederland |
| Topic 8  | <b><i>Forming a gov't (Belgium)</i></b>               | 0.034 | regering - corona - coronavirus - komt - zaken - land - federale - crisis - virus - vormen - duidelijk - politici - belgische - nodig - situatie                                                                                |
| Topic 9  | <b><i>Italy: schools</i></b>                          | 0.034 | regering - coronavirus - italiaanse - maatregelen - italie - bedrijven - scholen - covid - maand - getroffen - maart - corona - sportevenementen - federale - publiek                                                           |
| Topic 10 | <b><i>Infected, dead of COVID-19 in NL</i></b>        | 0.030 | corona - doden - griep - overleden - coronavirus - man - virus - besmet - mensen - Twitter&utm_medium - iran - social&utm_campaign - socialsharing_web - blijft - kans                                                          |
| Topic 11 | <b><i>COVID-19 strategies internationally</i></b>     | 0.030 | corona - regering - wereld - media - virus - trump - nie - grootste - chinezen - histerie - politiek - miljard - china - ter - natuurlijk                                                                                       |
| Topic 12 | <b><i>Rejection of early COVID-19 debate</i></b>      | 0.030 | regering - coronavirus - rutte - corona - gevolgen - recht - baudet - debat - minister - uitbraak - hoog - politieke - aanpak - pakken - land                                                                                   |
| Topic 13 | <b><i>European cooperation</i></b>                    | 0.029 | coronavirus - rutte - europese - samenwerking - nos - wenselijk - gaat - https://nos.nl/ - economie - gebruikt - staat - vanzelf - minister-president - liegen - klap                                                           |
| Topic 14 | <b><i>Emergency scenarios</i></b>                     | 0.029 | coronavirus - rutte - kabinet - aanpak - werkt - deskundigen - noodscenario's - bepalen - noodscenarios - rutte-kabinet-werkt - nl/politiek - https://www - coronavirus.html - nl-nl/bb - http://a.msn.com                      |
| Topic 15 | <b><i>Containment strategy</i></b>                    | 0.029 | rutte - coronavirus - minister - crisisoverleg - volgende - voorbereiding - morgen - nodig - corona-fase - nos - premier - ministers - bruins - fase - persconferentie                                                          |
| Topic 16 | <b><i>News outlets</i></b>                            | 0.027 | minpres - nos - rivm - coronavirusnederland - bruno_bruins - minvws - persconferentie - telegraaf - kijk - jinek - coronavirusnl - rtlnieuws - corona - npo - nieuwsuur                                                         |
| Topic 17 | <b><i>Air travel</i></b>                              | 0.027 | corona - minpres - ziek - goed - wachten - lekker - rutte - tweets - zien - tonen - schiphol - media - mooie - wist - hulp                                                                                                      |
| Topic 18 | <b><i>Statistics and knowledge – who to trust</i></b> | 0.025 | regering - den - haag - covid - risico - verhaal - experts - groei - cijfers - artsen - inclusief - status - deskundige - corona-uitbraak - kop                                                                                 |
| Topic 19 | <b><i>Extra containment measures</i></b>              | 0.024 | rutte - stop - handen - schudden - extra - kondigt - coronavirus - corona-maatregel - nl/coronavirus - https://www - handen-schudden.html - rutte-kondigt-extra-corona-maatregel - gaan - oproep - maatregelen                  |
| Topic 20 | <b><i>Italy: lockdown</i></b>                         | 0.022 | quarantaine - regering - coronavirus - italie - inwoners - sluit - https://www - kwart - coronavirus.html - nl/buitenland - noorden - italiaanse - regering-italie-sluit-noorden - nunl - miljoen                               |



| TABLE C2: THE NETHERLANDS, PHASE 2 (K=20, ITERATIONS=2000, WORDS-PER-TOPIC=20, N=21842) |                                                           |                                                                                                                                                                                                                                                                                                                             |
|-----------------------------------------------------------------------------------------|-----------------------------------------------------------|-----------------------------------------------------------------------------------------------------------------------------------------------------------------------------------------------------------------------------------------------------------------------------------------------------------------------------|
| Topic                                                                                   | Wgt                                                       | Topic words                                                                                                                                                                                                                                                                                                                 |
| Topic 1                                                                                 | <b>COVID-19 strategy</b>                                  | 0.228<br>covid - minpres - rivm - nederland - coronavirusnederland - rutte - coronavirus - lockdown - coronavirusnl - coronanederland - maatregelen - gaat - gaan - mensen - coronacrisis                                                                                                                                   |
| Topic 2                                                                                 | <b>Minister President Rutte</b>                           | 0.158<br>rutte - corona - allemaal - zegt - mensen - coronavirus - krijgen - virus - minpres - echt - gaat - mark - covid - coronanederland - gaan                                                                                                                                                                          |
| Topic 3                                                                                 | <b>Effectiveness of herd immunity</b>                     | 0.149<br>rutte - corona - mensen - virus - groepsimmunititeit - coronavirus - covid - coronanederland - laten - gaan - gaat - krijgen - doden - bevolking - ouderen                                                                                                                                                         |
| Topic 4                                                                                 | <b>Press conference</b>                                   | 0.144<br>rutte - minpres - coronanederland - toespraak - covid - coronavirus - goed - coronacrisis - corona - duidelijk - speech - mark - elkaar - goede - premier                                                                                                                                                          |
| Topic 5                                                                                 | <b>Gov't prioritizes economy</b>                          | 0.121<br>corona - rutte - regering - coronavirus - crisis - gaat - vvd - economie - land - gaan - virus - geld - wereld - kabinet - laat                                                                                                                                                                                    |
| Topic 6                                                                                 | <b>Gov't line vs. expert recommendations</b>              | 0.117<br>rutte - rivm - corona - coronavirus - regering - kabinet - wilders - laat - baudet - aanpak - coronavirusnederland - covid - experts - coronadebat - deskundigen                                                                                                                                                   |
| Topic 7                                                                                 | <b>Closing schools</b>                                    | 0.108<br>scholen - kinderen - rutte - minpres - coronavirus - dicht - open - corona - covid - coronavirusnederland - sluiten - blijven - school - thuis - ouders                                                                                                                                                            |
| Topic 8                                                                                 | <b>Infectivity statistics</b>                             | 0.074<br>corona - doden - mensen - aantal - nederland - minpres - besmettingen - rivm - patiënten - coronavirus - covid - ziekenhuizen - rutte - week - ziekenhuis                                                                                                                                                          |
| Topic 9                                                                                 | <b>Economy</b>                                            | 0.062<br>zorg - minpres - corona - regering - mensen - coronavirus - geld - coronacrisis - bedrijven - rutte - covid - betalen - onderwijs - kabinet - extra                                                                                                                                                                |
| Topic 10                                                                                | <b>Extra containment measures</b>                         | 0.059<br>regering - maatregelen - coronavirus - nieuwe - verspreiding - maart - corona - covid - gaan - genomen - nederland - april - sluiten - nederlandse - neemt                                                                                                                                                         |
| Topic 11                                                                                | <b>Press conference</b>                                   | 0.058<br>rutte - coronavirus - premier - land - spreekt - persconferentie - corona - mark - uur - nos - morgen - toespraak - live - maandag - maatregelen                                                                                                                                                                   |
| Topic 12                                                                                | <b>Lockdown</b>                                           | 0.056<br>corona - minpres - thuis - mensen - coronavirus - rutte - werken - werk - regering - mogelijk - blijf - blijven - jaar - huis - dag                                                                                                                                                                                |
| Topic 13                                                                                | <b>Social distancing</b>                                  | 0.053<br>mensen - afstand - minpres - houden - meter - coronacrisis - corona - elkaar - rutte - covid - coronavirusnl - regering - coronavirusnederland - persconferentie - regels                                                                                                                                          |
| Topic 14                                                                                | <b>Dutch politicians</b>                                  | 0.046<br>minpres - geertwilderspvv - thierrybaudet - rivm - vvd - jesseklaver - covid - coronavirus - bruno_bruins - ekamertweets - nos - robjetten - hugodejonge - coronavirusnederland - minvws                                                                                                                           |
| Topic 15                                                                                | <b>Gov't decisions (Belgium)</b>                          | 0.046<br>regering - corona - coronavirus - crisis - maatregelen - vertrouwen - federale - partijen - zaken - volmachten - zetten - vormen - nieuwe - strijd - covid                                                                                                                                                         |
| Topic 16                                                                                | <b>Shortage of intensive care resources</b>               | 0.032<br>coronavirus - testen - mondkapjes - regering - covid - test - minpres - corona - china - vaccin - tekort - trump - nederland - chinese - testkits                                                                                                                                                                  |
| Topic 17                                                                                | <b>Rutte: a majority of Dutch people will be infected</b> | 0.029<br>rutte - coronavirus - hamsteren - groot - besmet - deel - raken - nederlanders - <a href="https://www.bevolking.nl/coronavirus">https://www.bevolking.nl/coronavirus</a> - virus - premier - covid - nodig                                                                                                         |
| Topic 18                                                                                | <b>Telegraaf articles</b>                                 | 0.021<br>coronavirus - Twitter - referral&utm_campaign - telegraaf - t.co&utm_medium - <a href="https://www.telegraaf.nl/nieuws">https://www.telegraaf.nl/nieuws</a> - groepsimmunititeit - nederland - <a href="https://www.telegraaf.nl/t-jaap">https://www.telegraaf.nl/t-jaap</a> - mark - corona - straks - retorische |
| Topic 19                                                                                | <b>No proof of herd immunity</b>                          | 0.015<br>rutte - covid - risico - groot - <a href="https://www.dagelijksestandaard.nl">https://www.dagelijksestandaard.nl</a> - nek - arts - coronavirus - neemt - volkskrant - corona - regering - wetenschappelijke - groepsimmunititeit - lekker                                                                         |
| Topic 20                                                                                | <b>Greek refugee camps</b>                                | 0.012<br>rutte - social&utm_campaign - Twitter&utm_medium - corona - socialsharing_web - utm_source - oproep - vluchtelingen - griekse - uitbraak - haal - vrees - eilanden - cbaae - uitbraak-corona                                                                                                                       |

TABLE C3: THE NETHERLANDS, PHASE 3 (K=20, ITERATIONS=2000, WORDS-PER-TOPIC=20, N=9355)

| Topic    | Topic                                          | Wgt   | Topic words                                                                                                                                                                                              |
|----------|------------------------------------------------|-------|----------------------------------------------------------------------------------------------------------------------------------------------------------------------------------------------------------|
| Topic 1  | <b>COVID-19 in NL</b>                          | 0.533 | corona - rutte - regering - mensen - minpres - gaan - gaat - covid - coronavirus - goed - virus - laat - economie - maatregelen - komen -                                                                |
| Topic 2  | <b>Containment measures</b>                    | 0.171 | rutte - persconferentie - covid - minpres - coronavirus - coronamaatregelen - coronacrisis - corona - vragen - coronavirusnederland - mark - vraag - nos - premier - coronavirusnl -                     |
| Topic 3  | <b>Parliament, politicians</b>                 | 0.167 | rutte - corona - crisis - vvd - kabinet - zorg - gaat - coronacrisis - land - minpres - mark - beleid - regering - media - staat -                                                                       |
| Topic 4  | <b>Containment measures</b>                    | 0.157 | minpres - covid - rivm - hugodejonge - coronavirus - mondkapjes - coronavirusnederland - coronacrisis - coronavirusnl - coronanederland - nederland - coronamaatregelen - coronadebat - rutte - vvd -    |
| Topic 5  | <b>Retirement homes: infection increase</b>    | 0.107 | corona - rutte - ouderen - zorg - minpres - coronavirus - mensen - mondkapjes - testen - rivm - verpleeghuizen - personeel - besmet - hugodejonge - beschermen -                                         |
| Topic 6  | <b>Validity of RIVM statistics</b>             | 0.103 | corona - doden - rivm - aantal - mensen - rutte - cijfers - nederland - week - miljoen - lockdown - hoeveel - getest - virus - landen -                                                                  |
| Topic 7  | <b>Facemasks sent to China in February</b>     | 0.087 | rutte - trump - corona - coronavirus - china - rivm - baudet - februari - januari - regering - nederland - kabinet - strijd - laat - begin -                                                             |
| Topic 8  | <b>Reopening schools</b>                       | 0.074 | kinderen - minpres - open - scholen - rivm - covid - coronavirus - meter - coronavirusnederland - rutte - afstand - persconferentie - school - ouders - gaan -                                           |
| Topic 9  | <b>Bailouts</b>                                | 0.064 | geld - minpres - coronacrisis - rutte - corona - miljard - klm - betalen - euro - eurobonds - wbhoekstra - regering - steun - miljarden - bedrijven -                                                    |
| Topic 10 | <b>Lockdown</b>                                | 0.049 | coronavirus - rutte - maatregelen - persconferentie - april - premier - mei - corona - regering - gaan - evenementen - verlengd - mark - vanavond - komt -                                               |
| Topic 11 | <b>Bill Gates conspiracy</b>                   | 0.044 | nieuwe - rutte - normaal - corona - coronavirus - samenleving - middel - mark - nwo - hoax - new - gates - bill - trump - news -                                                                         |
| Topic 12 | <b>Containment measures (Belgium)</b>          | 0.039 | regering - covid - corona - boodschap - leven - hoop - exit - corona-lockdown - peiling - belgische - federale - natie - sophie_wilmes - hoeder - mondkapjes -                                           |
| Topic 13 | <b>Privacy: corona-apps</b>                    | 0.036 | app - corona - rutte - nodig - verplicht - regering - corona-apps - economie - apps - dreun - coronaapp - privacy - mark - kamer - corona-app -                                                          |
| Topic 14 | <b>Bill Gates conspiracy</b>                   | 0.035 | corona - telegraaf - Twitter - t.co&utm_medium - referral&utm_campaign - rutte - https://www.telegraaf.nl/nieuws - https://www.telegraaf.nl/t - gates - vaccin - werkt - bill - who - medicijn - zaken - |
| Topic 15 | <b>Rutte admits mistakes</b>                   | 0.032 | rutte - gemaakt - fouten - corona-aanpak - ten - https://www - gezondheid - vrijheid - ongetwijfeld - koste - nl/coronavirus - nunl - ongetwijfeld-fouten-gemaakt.html - gaan - nederland -              |
| Topic 16 | <b>British investigation into China</b>        | 0.029 | regering - coronavirus - covid - china - onderzoek - britse - wereld - wuhan - chinese - vriendjes - ter - amerikaanse - iwar - massaal - voorkomen -                                                    |
| Topic 17 | <b>Retirement homes: Rutte's mother's home</b> | 0.027 | social&utm_campaign - Twitter&utm_medium - socialsharing_web - rutte - verpleeghuis - den - utm_source - coronavirus - corona-diktatuur - mark - haag - moeder - adc - ruttess-moeder - vandaag -        |
| Topic 18 | <b>Facemasks</b>                               | 0.027 | regering - covid - mondkapjes - merkel - mondkapje - macron - maskers - slechte - youtube - duitse - dragen - zie - rutte&cs - openbaar - super -                                                        |
| Topic 19 | <b>Rutte advises caution</b>                   | 0.027 | the - regering - spijt - achteraf - covid - voorzichtigheid - beter - artikel - https://bit.ly - team - and - jan - lees - brief - open -                                                                |
| Topic 20 | <b>Negative expert feedback (psychology)</b>   | 0.015 | groningen - zelden - rutte - domme - psycholoog - opstand - corona-aanpak - gehoord - maatregelen - komt - martin - Twitter - appelo - corona-aanpak-rutte - komt-opstand                                |

TABLE D1: SWEDEN, PHASE 1 (K=20, ITERATIONS=2000, WORDS-PER-TOPIC=20, N=587)

| Topic    | Wgt   | Topic words                                                                                                                                                                                                                                                                                                                                                       |
|----------|-------|-------------------------------------------------------------------------------------------------------------------------------------------------------------------------------------------------------------------------------------------------------------------------------------------------------------------------------------------------------------------|
| Topic 1  | 0.949 | corona - regeringen - regering - sverige - ska - kommer - bara - får - covid - viruset - vill - statsminister - svpol - coronavirus - svenska -                                                                                                                                                                                                                   |
| Topic 2  | 0.392 | coronavirus - covid - svpol - swedishpm - löfven - stefan - iran - coronaviruset - folkhalsomynd - corona - fall - socialdemokrat - italien - åtgärder - karantän -                                                                                                                                                                                               |
| Topic 3  | 0.075 | komma - såg - flyktingar - säga - bakom - står - fattar - panik - utanför - flyr - skall - kontroller - <a href="https://bladet.se/nyheter/flyktingar-fran-syrien-bar-pa-coronavirus-regeringen-godtar-frivilliga-kontroller">https://bladet.se/nyheter/flyktingar-fran-syrien-bar-pa-coronavirus-regeringen-godtar-frivilliga-kontroller</a> - naiva - grekisk - |
| Topic 4  | 0.071 | media - mindre - krishanteringsrådet - epg/regeringen-kallar-in-myndigheter - kallas - senfärdighet - aldrig - kanske - statsminister - krisrad - <a href="https://www.aftonbladet.se/nyheter/samhalle/a/ew">https://www.aftonbladet.se/nyheter/samhalle/a/ew</a> - riket - alltså - regioner - ygeman -                                                          |
| Topic 5  | 0.067 | mest - eftersom - inkompetenta - skolor - måste - fram - italien - region - kunna - visar - korrupt - avbryter - ang - löser - kalla -                                                                                                                                                                                                                            |
| Topic 6  | 0.062 | beredskap - god - värden - bryr - riksdagen - situationen - informeras - medierna - onsdagen - finlands - behandlade - lugn - sju - värsta - regeringens -                                                                                                                                                                                                        |
| Topic 7  | 0.067 | expressen - löfven - stefan - twtr - Twitter&social - social_sharing&utm_source - link&utm_campaign - ställer - möte - grund - eget-mote - <a href="https://www.expressen.se/nyheter/stefan-lofven-kallar">https://www.expressen.se/nyheter/stefan-lofven-kallar</a> - kallar - sydafrika - resa -                                                                |
| Topic 8  | 0.055 | tidigare - äldre - första - problemet - magdalena - lite - bra - vecka - landstinget - rad - välfärden - beröm - andersson - finansdepsv - <a href="https://ledarsidorna.se">https://ledarsidorna.se</a> -                                                                                                                                                        |
| Topic 9  | 0.053 | myndigheter - kallar - epg - <a href="https://www.aftonbladet.se/a/ew">https://www.aftonbladet.se/a/ew</a> - krisråd - företag - namn - sr_ekot - people - löner - utsatta - pressträff - sänka - stämmer - massa -                                                                                                                                               |
| Topic 10 | 0.052 | följer - minut - utvecklingen - noga - följa - hurra - stund - chansen - oerhört - lösning - års - krafttag - flyktingvåg - kommit - mkt -                                                                                                                                                                                                                        |
| Topic 11 | 0.050 | nästan - betala - usa - handlar - smittan - höjd - tänka - hotet - ena - testet - långt - sämsta - <a href="https://www.aftonbladet.se/a/qldnem">https://www.aftonbladet.se/a/qldnem</a> - samtal - extrapersonal -                                                                                                                                               |
| Topic 12 | 0.047 | sade - statsministern - sydafrika - noll - resa - gjorde - utbrott - leder - precis - ramx/virusprofessorn-varsta-epidemin - riskområde - listar - storbritannien - vips - lista -                                                                                                                                                                                |
| Topic 13 | 0.047 | corona-viruset - italienska - även - grund - serie - publik - lugna - gått - sänka - corona-utbrottet - också - samt - skyller - gör - regeringen -                                                                                                                                                                                                               |
| Topic 14 | 0.047 | nya - socialdemokraterna - krismöte - klarar - sprider - skit - fått - vfoypn - <a href="http://bit.ly">http://bit.ly</a> - suicide - depression - prata - beslut - triumfer - gigantiska -                                                                                                                                                                       |
| Topic 15 | 0.046 | sätter - israel - melodifestivalen - redan - sjukdom - hälsofarlig - början - väl - först - medborgare - besked - medier - sociala - res - syns -                                                                                                                                                                                                                 |
| Topic 16 | 0.046 | åtgärder - spridningen - nödvändiga - vidtagit - samhället - hittills - trygg - spara - bongo - pensionsutbetalningar - välkommet - vidta - sjukdom - andra-lander-stanger-granser - varnar -                                                                                                                                                                     |
| Topic 17 | 0.046 | hand - svenskar - nytt - hjälp - test - trots - hellre - livet - föredöme - kommuner - arbetslöshet - fråga - tält - låta - kritiken -                                                                                                                                                                                                                            |
| Topic 18 | 0.044 | tills - läs - igår - fantastiskt - dödar - bort - släpper - möjligheten - tanke - nära - påstår - upprörande - coronavirusdebatten-demokraternas-nya-bluff - hyllar - tyskl - vilja - sittande - stora - testas - därför - store - påverkar - tänker - brukar - suck - syndare - församlingen - munskydd - systemet - berörda -                                   |
| Topic 19 | 0.043 | osv - ansvaret - mette - publik - corona-beredskap - januari - planerar - svenska - tänk - frederiksen - högerextrema - misströnde - hemlig-corona-beredskap - försvaret - hemlig                                                                                                                                                                                 |

| TABLE D2: SWEDEN. PHASE 2 (K=20, ITERATIONS=2000, WORDS-PER-TOPIC=20, N=2594) |                                                           |       |                                                                                                                                                                                                                                                                                      |
|-------------------------------------------------------------------------------|-----------------------------------------------------------|-------|--------------------------------------------------------------------------------------------------------------------------------------------------------------------------------------------------------------------------------------------------------------------------------------|
|                                                                               | Topic                                                     | Wgt   | Topic words                                                                                                                                                                                                                                                                          |
| Topic 1                                                                       | <b>COVID-19 in SE</b>                                     | 0.606 | corona - regeringen - regering - kommer - ska - covid - bara - får - sverige - måste - andra - mer - göra - få - finns -                                                                                                                                                             |
| Topic 2                                                                       | <b>Swedish authorities</b>                                | 0.504 | covid - regeringen - sverige - svpol - swedishpm - coronavirussverige - coronavirus - corona - coronasverige - folkhalsomynd - gör - coronaviruset - regering - skolor - tegnell -                                                                                                   |
| Topic 3                                                                       | <b>Prime minister holds speech</b>                        | 0.147 | löfven - stefan - statsminister - tal - coronavirussverige - corona - statsministern - svpol - nationen - covid - svt - håller - presskonferens - coronasverige - bra -                                                                                                              |
| Topic 4                                                                       | <b>Business bailout</b>                                   | 0.086 | regeringen - företag - corona - covid - miljarder - coronasverige - bra - svpol - kommer - staten - extra - mer - åtgärder - krispaket - anledning -                                                                                                                                 |
| Topic 5                                                                       | <b>Gov't and Folkhälsomyndigheten</b>                     | 0.079 | beslut - tegnell - vill - komma - regeringen - anders - corona-viruset - fatta - tiden - såg - fick - folkhälsomyndigheten - spelar - fattar - hos -                                                                                                                                 |
| Topic 6                                                                       | <b>Ban on large gatherings</b>                            | 0.057 | fler - beslutat - personer - regeringen - sammankomster - coronavirus - beslutet - mars - offentliga - förbud - danska - statsminister - centerpartiet - tillfälligt - allmänna -                                                                                                    |
| Topic 7                                                                       | <b>High schools and universities closing</b>              | 0.057 | hemma - regeringen - skolan - stanna - barn - skolorna - coronasverige - elever - studenter - uppmanar - stänga - covid - föräldrar - stängs - beslut -                                                                                                                              |
| Topic 8                                                                       | <b>Online petition: quarantine Sweden proactively</b>     | 0.049 | löfven - stefan - karantän - sätt - sverige - stoppa - proaktivt - corona-spridningen - change - petition - artikel - sign - <a href="https://sverigesradio.se/sida/artikel.aspx?programid=sr_ekot">https://sverigesradio.se/sida/artikel.aspx?programid=</a> sr_ekot - sydkorea -   |
| Topic 9                                                                       | <b>Healthcare capacity, esp. protective gear</b>          | 0.047 | slut - covid - socialstyrelsen - skyddsutrustning - lenahallengren - sjukhus - <a href="https://ledarsidorna.se">https://ledarsidorna.se</a> - första - världens - sjukvård - utrustning - ansvariga - personal - enbart - uppdrag -                                                 |
| Topic 10                                                                      | <b>Single Twitter user</b>                                | 0.041 | löfven - stefan - sverige - öppna - gränser - dag - iran - kriminella - varenda - virus - landet - invandrare - ryssland - smittad - charterresor -                                                                                                                                  |
| Topic 11                                                                      | <b>Jimmie Åkesson (SD) travels to Greek refugee camps</b> | 0.039 | åkesson - statsminister - jimmie - väl - kristersson - förra - politiska - fått - journalister - ulf - senaste - samtal - veckan - turkiet - sprängningar -                                                                                                                          |
| Topic 12                                                                      | <b>Criticism of gov't</b>                                 | 0.039 | politik - visar - svpol - politiker - ger - samhälle - beredskap - inse - världen - regering - dinröst - starkt - fhm - dags - hävdade -                                                                                                                                             |
| Topic 13                                                                      | <b>Refugees from high-risk zones</b>                      | 0.034 | hit - världen - delar - drabbade - åka - fortsätter - hårt - migranter - ifrån - värst - inreseförbudet - afterski - hem - problem - undantas -                                                                                                                                      |
| Topic 14                                                                      | <b>New restrictions (Finland)</b>                         | 0.033 | finland - finlands - restauranger - social - marinsanna - förbereder - öppet - <a href="https://svenska.yle.fi/artikel">https://svenska.yle.fi/artikel</a> - följ - restriktioner - rekommendationer - införa - statsminister - coronavirus - Twitter-share&utm_medium -             |
| Topic 15                                                                      | <b>Criticism of gov't</b>                                 | 0.033 | samt - skriver - långt - ännu - vänstern - ifrån - gång - ministrar - sätt - fokus - agerat - någonting - framöver - arbetet - kört -                                                                                                                                                |
| Topic 16                                                                      | <b>Single Twitter user</b>                                | 0.031 | svt nyheter - regionstockholm - del:tw - äldre - stockholm - <a href="https://www.tv-region-svpol">https://www.tv-region-svpol</a> - personer - redo - coronasmittade - fruktansvärt - jö - <a href="https://play.se/program/nyhetsmorgon">play.se/program/nyhetsmorgon</a> - ännu - |
| Topic 17                                                                      | <b>Gov't vs. expert recommendations</b>                   | 0.031 | regeringens - pandemi - sjöfart - gå - milj - talet - lämnas - iwar - miljon - tillbaka - dog - handlingskraft - utifrån - verkar - hong -                                                                                                                                           |
| Topic 18                                                                      | <b>COVID-19 internationally</b>                           | 0.030 | trump - usa - coronavirus - kinesiska - tyska - betala - viruset - ser - köpa - kör - lyssnade - kinas - medlemmar - män - usas -                                                                                                                                                    |
| Topic 19                                                                      | <b>Morgan Johansson as backup for Löfven</b>              | 0.027 | expressen - sjuk - corona - löfven - twtr - Twitter&social - social_sharing&utm_source - link&utm_campaign - stefan - morgan - tar - johansson - partiledarna - corona/?utm_medium - lofven -                                                                                        |
| Topic 20                                                                      | <b>Löfven's nationalistic behavior (rtw: video)</b>       | 0.026 | youtube - nationalist - spåren - arga - bern - lars - februari - m-m - posts - redan - hansson - tragiskt - opposition - <a href="https://youtu.be/hrn">https://youtu.be/hrn</a> - snälla -                                                                                          |

TABLE D3: SWEDEN. PHASE 3 (K=20, ITERATIONS=2000, WORDS-PER-TOPIC=20, N=1120)

| Topic    | Topic                                                          | Wgt   | Topic words                                                                                                                                                                                                                                                                                                                                                                                                                                            |
|----------|----------------------------------------------------------------|-------|--------------------------------------------------------------------------------------------------------------------------------------------------------------------------------------------------------------------------------------------------------------------------------------------------------------------------------------------------------------------------------------------------------------------------------------------------------|
| Topic 1  | <b>COVID-19 in SE</b>                                          | 0.969 | regeringen - corona - covid - sverige - regering - svpol - löfven - ska - kommer - stefan - coronasverige - många - får - bara - mer -                                                                                                                                                                                                                                                                                                                 |
| Topic 2  | <b>Political parties</b>                                       | 0.156 | covid - swedishpm - svpol - folkhalsomynd - sverige - socialdemokrat - coronavirussverige - lenahallengren - coronasverige - coronavirus - socialstyrelsen - strategi - tack - miljöpartiet - migpol -                                                                                                                                                                                                                                                 |
| Topic 3  | <b>Business bailout</b>                                        | 0.058 | regeringen - ska - miljarder - företag - nya - coronasverige - stödet - miljoner - skriver - vabba - personalen - anledning - gälla - krispaket - dag -                                                                                                                                                                                                                                                                                                |
| Topic 4  | <b>Care homes not sufficiently protected</b>                   | 0.053 | dör - gamla - munskydd - hårt - äldreboenden - resurser - arbetar - tester - extra - vanlig - drabbas - flockimunitet - drabbade - sjukhus - skydd -                                                                                                                                                                                                                                                                                                   |
| Topic 5  | <b>New Zealand gov't takes paycut</b>                          | 0.052 | nya - löner - regering - lön - zeelands - president - ekonomin - bort - unga - corona-sänker - imorgon - samhälle - egen - trump - myndighet -                                                                                                                                                                                                                                                                                                         |
| Topic 6  | <b>Call for political action, political transparency</b>       | 0.047 | svt - trump - svtnyheter - statens - kritiserar - svaga - läser - olika - gjorde - statsminister - agerande - intressant - flesta - tystnad - medier -                                                                                                                                                                                                                                                                                                 |
| Topic 7  | <b>"Sweden for the Swedes" (mostly single Twitter user)</b>    | 0.047 | sverige - dag - viruset - afghaner - svenskarna - islamister - diktatur - gränser - invandrare - landet - nyanlända - iran - analfabeter - bidrags - fortsätter -                                                                                                                                                                                                                                                                                      |
| Topic 8  | <b>New restrictions on gambling</b>                            | 0.047 | åtgärder - minska - ekonomiska - regeringen - utbrottet - spelmarknaden - covid - följer - företagare - krav - företagen - krävs - tillfälligt - europas - vidtar -                                                                                                                                                                                                                                                                                    |
| Topic 9  | <b>Abolishment of karensavdrag (self-paid first sick days)</b> | 0.046 | corona - bl.a - åkesson - tänka - gäller - dagens - jimie - karensavdraget - tid - makten - problemet - positivt - nyheter - ang - räcker -                                                                                                                                                                                                                                                                                                            |
| Topic 10 | <b>Fatality: SE vs. rest of Fennoscandia</b>                   | 0.045 | sverige - myndigheterna - corona-pandemin-sverige-regeringen - dödligheten - norge - danmark - corona-pandemin - finland - myndigheterna-togs-pa-sangen - se/debatt-artiklar - <a href="http://www.news-sängen-togs-dödligheten-igen">http://www.news-sängen-togs-dödligheten-igen</a> -                                                                                                                                                               |
| Topic 11 | <b>Failed gov't</b>                                            | 0.044 | misslyckats - läs - maste-politikerna-gripa-in - <a href="https://www.dn.se/debatt/folkhalsomyndigheten-agera-styr-dags-leder-knappast-beredskapslagen-hem-journalist-faktiskt-lyssna-covid">https://www.dn.se/debatt/folkhalsomyndigheten-agera-styr-dags-leder-knappast-beredskapslagen-hem-journalist-faktiskt-lyssna-covid</a> -                                                                                                                   |
| Topic 12 | <b>Löfven (Finland)</b>                                        | 0.043 | statsminister - löfven - stefan - <a href="https://svenska.yle.fi/artikel-kom-jubla-läget-johan-person-analys-coronavirus-sade-öppnas-prata-bort">https://svenska.yle.fi/artikel-kom-jubla-läget-johan-person-analys-coronavirus-sade-öppnas-prata-bort</a> -                                                                                                                                                                                          |
| Topic 13 | <b>High mortality in SE*</b>                                   | 0.041 | fallet - lyckas - drar - riksdagen - viruset - ganska - lägga - motsvarar - införa - bekräftade - skillnaden - högt - flyg - sociala - utsatta -                                                                                                                                                                                                                                                                                                       |
| Topic 14 | <b>Lack of support for health care personel</b>                | 0.039 | vårdpersonal - sviker - karensdagen - analyser - höll - anställda - minst - coronakrisen - svenska - tyvärr - slopa - försök - ansiktsmasker - ensamkommande - skatt -                                                                                                                                                                                                                                                                                 |
| Topic 15 | <b>Sending children to school</b>                              | 0.039 | skolan - hemma - galla - två - människor - procent - barn - lärare - smittar - anna_ekstrom - spills - fredag - innebär - uteserveringar - föräldrar -                                                                                                                                                                                                                                                                                                 |
| Topic 16 | <b>No proof of herd immunity</b>                               | 0.037 | expressen - immunitet - bevis - aftonbladet - möjligt - säkra - tag - bort - förslag - testning - fem - förstår - html - antagande - osäkra -                                                                                                                                                                                                                                                                                                          |
| Topic 17 | <b>Expert calls Tegnell a fraud</b>                            | 0.036 | svenska - regeringen - forskare - jan - läkare - tegnell - kritisk - hanterat - stillström - corona-epidemin - virolog - pensionerad - tillsatt - docent - vården -                                                                                                                                                                                                                                                                                    |
| Topic 18 | <b>Fatalities in care homes</b>                                | 0.035 | grupper - uppdrag - särskilt - äldreboenden - ersättning - forskning - vaccin - stoppa - peka-finger-at-varandra - ratt-tid - äldreboendena - <a href="https://www.dn.se/nyheter/sverige/lofven">https://www.dn.se/nyheter/sverige/lofven</a> - <a href="http://dn.se-drabbas-insatserna">http://dn.se-drabbas-insatserna</a> -                                                                                                                        |
| Topic 19 | <b>Gov't prioritizes economy</b>                               | 0.035 | pengar - tala - passar - kris - trodde - <a href="https://twitter.com/believreuro/status-ordförande-vänstern-extra-svarar-mänskliga-regeringen-bara-loser-naringslivets-kris">https://twitter.com/believreuro/status-ordförande-vänstern-extra-svarar-mänskliga-regeringen-bara-loser-naringslivets-kris</a> - <a href="https://www.dn.se/debatt/forvanande-miljarder-nedskärningar">https://www.dn.se/debatt/forvanande-miljarder-nedskärningar</a> - |
| Topic 20 | <b>Prime minister admits mistake</b>                           | 0.030 | svtnyheter - del:tw - fick - beräkningar - pappa - bromsen - betala - uppger - msbse - beredskapen - korrupta - betalas - information - kommer - tillräckligt-bra:nyh:lp -                                                                                                                                                                                                                                                                             |
